# Supplementary material for: p53 Loss Mediates Hypersensitivity to ETS Transcription Factor Inhibition Based on PARylation-Mediated Cell Death Induction
Source: MDPI journal article supplement (doi:10.3390/cancers12113205), 2020-10-30
Supplement: s1 [file s1]

**Table S1: Antibodies**

| <b>Antibody</b>                | <b>Cat. No./Company</b>     | <b>Dilution</b> | <b>2<sup>nd</sup> Antibody</b> |
|--------------------------------|-----------------------------|-----------------|--------------------------------|
| AIF                            | #5318, Cell Signaling       | 1:1000          | rabbit                         |
| BAX                            | #2772, Cell Signaling       | 1:1000          | rabbit                         |
| cleaved PARP1 (Asp214)         | #9541, Cell Signaling       | 1:1000          | rabbit                         |
| ETS1 (D808A)                   | #14069, Cell Signaling      | 1:1000          | rabbit                         |
| phospho-ETS1 (Thr38)           | SAB4503912, Sigma Aldrich   | 1:500           | rabbit                         |
| ETS2                           | sc-365666, Santa Cruz       | 1:500           | mouse                          |
| ETV1                           | H00002115-M01, Abnova       | 1:250           | rabbit                         |
| FLI1 (C-19)                    | sc-356, Santa Cruz          | 1:1000          | rabbit                         |
| GAPDH (D16H11)                 | #5174, Cell Signaling       | 1:1000          | rabbit                         |
| Phospho-Histone H2A.X (Ser139) | #9718, Cell Signaling       | 1:1000          | rabbit                         |
| Lamin A/C                      | #4777, Cell Signaling       | 1:2000          | mouse                          |
| MCL-1                          | sc-819, Santa Cruz          | 1:1000          | rabbit                         |
| p21                            | #2947, Cell Signaling       | 1:1000          | rabbit                         |
| p53 AB-6 (DO1)                 | MS-187-P, Thermo Scientific | 1:1000          | mouse                          |
| pADPr                          | sc-56198, Santa Cruz        | 1:200           | mouse                          |
| PARP1                          | #9542, Cell Signaling       | 1:1000          | rabbit                         |
| β-actin                        | A5441, Sigma Aldrich        | 1:2000          | mouse                          |
| mouse-anti-rabbit IgG-HRP      | sc-2357, Santa Cruz         | 1:10000         |                                |
| mouse IgG-HRP                  | GTX213111-01, GeneTex       | 1:10000         |                                |
