# Supplementary material for: p53 Loss Mediates Hypersensitivity to ETS Transcription Factor Inhibition Based on PARylation-Mediated Cell Death Induction
Source: MDPI journal article supplement (doi:10.3390/cancers12113205), 2020-10-30
Supplement: s1 [file s1]

**Table S2: Primers for qRT-PCR**

| Gene          | Primer forward (sense)      | Primer reverse (antisense)   |
|---------------|-----------------------------|------------------------------|
| <i>ETS1</i>   | 5' CTTTCTGACCCAGATGAG 3'    | 5' GCTGTCTTGTGGATGATG 3'     |
| <i>ETS2</i>   | 5'-TCCGTCAGCGTCACCTACT-3'   | 5'-AACCCGTTGCACATCCAG-3'     |
| <i>ETV1</i>   | 5'-GCCGTTCACTCCGCTATTAC-3'  | 5'-CTGTGTCCTCCTCGTTGATG-3'   |
| <i>ETV4</i>   | 5'-ACTTCGCCTACGACTCAGATG-3' | 5'-GAGGTTTCTCATAGCCATAGCC-3' |
| <i>ETV5</i>   | 5'-CCAAAGATGATGCCTGAAAAC-3' | 5'-GGGCGATTATCTCCAGGAAC-3'   |
| <i>RPL-41</i> | 5`CAAGTGGAGGAAGAAGCGA 3`    | 5`TTACTTGGACCTCTGCCTC 3`     |
